# Supplementary material
Source: HighWire-hosted journal article supplement (https://bmjopen.bmj.com/content/9/3/e028042)
Supplement: inline-supplementary-material-1 [file inline-supplementary-material-1.pdf]

**References (used to identify appropriate search terms)**

Arnberg FK, Linton SJ, Hultcrantz M, et al. Internet-delivered psychological treatments for mood and anxiety disorders: a systematic review of their efficacy, safety, and cost-effectiveness. *PLoS ONE* 2014;9(5):e98118.

Bee EP, Bower P, Lovell K, et al. Psychotherapy mediated by remote communication technologies: A meta-analytic review. *BMC Psychiatry* 2008;8(1):60.

Ecclestone C, Fisher E, Craig L, et al. Psychological therapies (Internet-delivered) for the management of chronic pain in adults. *Cochrane Database System Rev* 2014;2:CD010152.

Thabrew H, Stasiak K, Hetrick SE, et al. Psychological therapies for anxiety and depression in children and adolescents with long-term physical conditions. *Cochrane Database System Rev* 2017;1:CD012488.

**The Cochrane Central Register of Controlled Trials (CENTRAL) will be searched using the following terms.**

| <b>[Intervention]</b> |                                                                                                                                                                                                                                                                                              |
|-----------------------|----------------------------------------------------------------------------------------------------------------------------------------------------------------------------------------------------------------------------------------------------------------------------------------------|
| 1.                    | (MESH DESCRIPTOR Internet EXPLODE ALL TREES)                                                                                                                                                                                                                                                 |
| 2.                    | (MESH DESCRIPTOR Telecommunications EXPLODE ALL TREES)                                                                                                                                                                                                                                       |
| 3.                    | (MESH DESCRIPTOR Computer-Assisted Instruction EXPLODE ALL TREES)                                                                                                                                                                                                                            |
| 4.                    | (MESH DESCRIPTOR Remote Consultation 1 TREE(S) EXPLODED)                                                                                                                                                                                                                                     |
| 5.                    | (MESH DESCRIPTOR Therapy, Computer-Assisted THIS TERM ONLY)                                                                                                                                                                                                                                  |
| 6.                    | ((telephon*) or (teleconferencing) or (teleconference*) or (teleconsult*) or (telehealth) or (tele-health) or (teletherap*) or (telecomm*) or (telemed*) or (telemonitor*) or (telephone) or (telepsych*) or (telephone-administered) or ("cell phone") or (cellphone) or (phone*)):ti,ab,kw |
| 7.                    | ((app) or (application)):ti,ab,kw                                                                                                                                                                                                                                                            |
| 8.                    | ((internet) or (internet-delivered) or (internet-based) or ("internet-based CBT") or ("internet-based cognitive behavio* therap*") or (internet-guided) or (interapy)):ti,ab,kw                                                                                                              |
| 9.                    | ((online*) or (on-line) or (cyber*)):ti,ab,kw                                                                                                                                                                                                                                                |
| 10.                   | (("Therapy, Computer-Assisted") or (computer-based) or (computer*) or (computer-administered) or (computer-assisted) or (computer-aided) or (computer-delivered)):ti,ab,kw                                                                                                                   |
| 11.                   | ((website) or (web) or (web-based) or (www)):ti,ab,kw                                                                                                                                                                                                                                        |
| 12.                   | ((videoconferencing) or (videophone*) or (videoconference*) or (skype)):ti,ab,kw                                                                                                                                                                                                             |
| 13.                   | (("electronic mail") or ("electronic and mail") or ("electronic and communication") or ("electronic health*") or (e-mail*) or (email*)):ti,ab,kw                                                                                                                                             |
| 14.                   | ((virtual*) or (vr)):ti,ab,kw                                                                                                                                                                                                                                                                |
| 15.                   | (("augmented reality") or (ar)):ti,ab,kw                                                                                                                                                                                                                                                     |
| 16.                   | (("text and messag*") or (SMS) or ("short and messag*") or ("text messag*") or (texting)):ti,ab,kw                                                                                                                                                                                           |
| 17.                   | (((medicine) or (ehealth) or (e-medicine) or (e-health) or (mhealth) or (m-health) or (e-portal) or (eportal) or (etherap*) or (e-therap*)):ti,ab,kw                                                                                                                                         |
| 18.                   | ((("technolog*-assisted") or ("technolog*-based") or (technolog*) or ("technology-based intervention")):ti,ab,kw                                                                                                                                                                             |
| 19.                   | ((interactive) or (multi-media) or (multimedia)):ti,ab,kw                                                                                                                                                                                                                                    |
| 20.                   | ((android) or (iOS) or (windows) or (software)):ti,ab,kw                                                                                                                                                                                                                                     |
| 21.                   | (ict):ti,ab,kw                                                                                                                                                                                                                                                                               |
| 22.                   | ((ipad) or (i-pad) or (iphone) or (i-phone) or (ipod) or (i-pod)):ti,ab,kw                                                                                                                                                                                                                   |
| 23.                   | ((("social medi*") or ("social network* site*") or (facebook) or (blog) or (chat) or (forum*) or ("chat group")):ti,ab,kw                                                                                                                                                                    |
| 24.                   | ((cCBT) or (iCBT) or (iact) or (bcbt)):ti,ab,kw                                                                                                                                                                                                                                              |
| 25.                   | ((gaming) or ("instant messag*") or ("smart phone") or (smartphone) or (mobile) or (smartphone-supported) or ("with remind*")):ti,ab,kw                                                                                                                                                      |
| 26.                   | ((podcast) or (audio*)):ti,ab,kw                                                                                                                                                                                                                                                             |
| 27.                   | ((personal digital assistant) or (PDA) or (palmtop)):ti,ab,kw                                                                                                                                                                                                                                |
| 28.                   | ((CD-ROM) or (DVD)):ti,ab,kw                                                                                                                                                                                                                                                                 |
| 29.                   | (digital):ti,ab,kw                                                                                                                                                                                                                                                                           |
| 30.                   | ((("face to face versus") or ("blended therap*" or "blended-therap*" or blended near/5 therap*)):ti,ab,kw                                                                                                                                                                                    |
| 31.                   | ((distance) or (remote*)):ti,ab,kw                                                                                                                                                                                                                                                           |
| 32.                   | ((("Keeping the blues away") or (deprexis) or ("beating the blues") or ("overcoming depression") or (odin) or ("restoring the balance") or (MoodGym) or ("Mood Gym") or (Moodhelper) or ("mood helper") or (Sparx) or                                                                        |

Additional file 1 – search strategies of electronic databases

|                                                                                      |                                                                                                                                                                                                                                                                                                                                                                                                                                                                                                                                                                                                                                                                                                                                                                                                                                                                                                                                                             |
|--------------------------------------------------------------------------------------|-------------------------------------------------------------------------------------------------------------------------------------------------------------------------------------------------------------------------------------------------------------------------------------------------------------------------------------------------------------------------------------------------------------------------------------------------------------------------------------------------------------------------------------------------------------------------------------------------------------------------------------------------------------------------------------------------------------------------------------------------------------------------------------------------------------------------------------------------------------------------------------------------------------------------------------------------------------|
|                                                                                      | ("mood enhancer") or (moodenhancer) or ("get.on mood enhancer") or (sadnessprogram) or (subgap) or ("master your mood") or (mym) or (Depressionshjälpen) or (e-coach) or ("colour your life") or (cyl) or ("kleur je leven") or (psysit) or ("getting started") or ("mood manager") or (moodmanager) or (pst) or ("livinglifetothefull") or (littf) or ("project uplift") or ("the brighten your mood program")):ti,ab,kw                                                                                                                                                                                                                                                                                                                                                                                                                                                                                                                                   |
| 33.                                                                                  | 1 or 2 or 3 or 4 or 5 or 6 or 7 or 8 or 9 or 10 or 11 or 12 or 13 or 14 or 15 or 16 or 17 or 18 or 19 or 20 or 21 or 22 or 23 or 24 or 25 or 26 or 27 or 28 or 29 or 30 or 31 or 32                                                                                                                                                                                                                                                                                                                                                                                                                                                                                                                                                                                                                                                                                                                                                                         |
| <b>[Population/Condition]</b>                                                        |                                                                                                                                                                                                                                                                                                                                                                                                                                                                                                                                                                                                                                                                                                                                                                                                                                                                                                                                                             |
| 34.                                                                                  | MeSH descriptor: [Depression] explode all trees                                                                                                                                                                                                                                                                                                                                                                                                                                                                                                                                                                                                                                                                                                                                                                                                                                                                                                             |
| 35.                                                                                  | MeSH descriptor: [Depressive Disorder] explode all trees                                                                                                                                                                                                                                                                                                                                                                                                                                                                                                                                                                                                                                                                                                                                                                                                                                                                                                    |
| 36.                                                                                  | ((dysthymi*) or (depression) or (depressed) or (depressive) or ("mood disorder") or ("affective disorder")):ti,ab,kw                                                                                                                                                                                                                                                                                                                                                                                                                                                                                                                                                                                                                                                                                                                                                                                                                                        |
| 37.                                                                                  | 34 or 35 or 36                                                                                                                                                                                                                                                                                                                                                                                                                                                                                                                                                                                                                                                                                                                                                                                                                                                                                                                                              |
| <b>[Physical conditions (38-43) and age group (44) served as exclusion criteria]</b> |                                                                                                                                                                                                                                                                                                                                                                                                                                                                                                                                                                                                                                                                                                                                                                                                                                                                                                                                                             |
| 38.                                                                                  | ((("physical* ill*" or "medical* ill*" or "chronic disease" or (chronic* next (ill* or condition*1 or disease* or disorder* or health)) or (long term next (condition*1 or sick*)) or "medical* morbid*" or (medical* next (comorbid* or co morbid*)) or multimorbid* or (multi* next (morbid* or "co morbid*" or comorbid* or physical))):ti)                                                                                                                                                                                                                                                                                                                                                                                                                                                                                                                                                                                                              |
| 39.                                                                                  | ((AIDS or allerg* or angina or aneurysm or "ankylosing spondylitis" or arthropath* or arthriti* or arthrosis or arthroses or asthma* or "atrial fibrillation" or "autoimmune disease*" or "back pain" or blindness or "brain atroph*" or (bone next (disease* or disorder*)) or ((bronchi* or bowel) next (disease* or disorder*)) or bypass or (cancer or neoplasm* or neoplastic or malignan*) or (cardiac next (arrest or arrhythmia* or surg*)) or cardiomyopath* or ((cardiovascular or coronary) near/2 (disease* or disorder* or event*)) or "cerebral palsy" or (cerebrovascular near/2 (disease* or disorder* or event*)) or "chronic obstructive" or COPD or pain or cirrhosis or colitis or "congenital abnormalit*" or (congenital near/3 (disease or disorder*)) or coxarthrosis or Crohn* or Cushing* or "cystic fibrosis" or cystitis):ti)                                                                                                   |
| 40.                                                                                  | ((deaf* or deformit* or disabled or (physical next (deform* or disab* or impair*)) or dermatitis or dermato* or dorsopath* or diabet* or "digestive system*" or duoden* or dystonia or eczema or (endocrine next (disease* or disorder*)) or enuresis or epilep* or "eye disease*" or ("fatigue syndrome" or "chronic fatigue") or fibromyalgia or fibrosis or "food hypersensitivity" or (gastr* next (disease* or disorder*)) or gastritis or "genetic disorder*" or gout or (glomerul* next (disease* or disorder*)) or headache* or ((h?emic or lymph*) next (disease* or disorder*)) or h?ematuria or h?emophili* or h?emorrhag* or ((hearing or visual or vision) near/2 (aid* or impair* or loss)) or hemiplegi* or hepatitis or h?emodialysis or ((renal or kidney) next (disease* or disorder* or failure)) or (heart next (disease* or disorder* or failure or surg*)) or HIV or "human immunodeficiency virus" or hypertensi* or hypotensi*):ti) |
| 41.                                                                                  | ((("inflammatory disease*" or incontinen* or "irritable bowel" or isch?emi* or (joint next (disease* or disorder*)) or kyphosis or leuk? emia or ((liver or hepatic) next (disease* or disorder* or failure)) or lordosis or "lung disease*" or "lupus erythemat*" or lymphoma or "macular degeneration" or migraine* or "movement disorder*" or musculoskeletal or necrotizing or nephrotic* or neuromuscular or "multiple sclerosis" or myeloma):ti)                                                                                                                                                                                                                                                                                                                                                                                                                                                                                                      |
| 42.                                                                                  | ((("nephrotic syndrome" or ((nutritional or metabolic) next (disease* or disorder or syndrome*)) or (organ* near/2 (transplant* or recipient*)) or (neurological next (disease* or disorder*)) or occlusion* or obesity or obese or orthop?edic* or osteo* or "otitis media" or otorhinolaryngology* or otosclerosis or pancrea* or papulosquamous or paraplegi* or parkinson* or "peripheral vascular" or "pick disease*" or pneumoconiosis or polio* or polyarthropath* or polyarteritis or polyarthrosis or polyneuropath* or psoriasis or parapsoriasis or (pulmonary near/2 (disease* or disorder*))):ti)                                                                                                                                                                                                                                                                                                                                              |
| 43.                                                                                  | ((("respiratory next (disease* or disorder*)) or retinopathy or rheumat* or sclerosis or scoliosis or "sickle cell an?emia" or ((skin or "connective tissue") next (disease* or disorder*)) or ("sleep disorder*" or "sleep apn?ea" or insomnia* or dyssomnia* or hypersomnia*) or "spina bifida" or "spinal muscular atrophy" or spondylo* or stenosis* or stoma* or (stroke or strokes or "cerebral infarct*") or tetraplegi* or ((thyroid near (disease* or disorder* or dysfunction*)) or hyperthyroidism or hypothyroidism) or tuberculosis or (systemic near (disorder* or disease*)) or ulcer* or (urogenital next (disease* or disorder*)) or vasculopath* or (vascular near (disease* or disorder*)) or vestibular or ((virus or viral) next disease)):ti)                                                                                                                                                                                         |
| 44.                                                                                  | ((child* or boy* or girl* or infant* or juvenil* or minors or paediatric* or pediatric* or school* or preschool* or pre-school* or kindergarten or nursery or preadolesc* or pre-adolesc* or pubert* or pubescen* or prepube* or pre-pube* or high-school or teen*):ti)                                                                                                                                                                                                                                                                                                                                                                                                                                                                                                                                                                                                                                                                                     |
| 45.                                                                                  | 38 or 39 or 40 or 41 or 42 or 43 or 44                                                                                                                                                                                                                                                                                                                                                                                                                                                                                                                                                                                                                                                                                                                                                                                                                                                                                                                      |
| <b>[Study design (no field codes/tags were attached)]</b>                            |                                                                                                                                                                                                                                                                                                                                                                                                                                                                                                                                                                                                                                                                                                                                                                                                                                                                                                                                                             |
| 46.                                                                                  | (randomi?ed or randomi?ation or randomi?ing)                                                                                                                                                                                                                                                                                                                                                                                                                                                                                                                                                                                                                                                                                                                                                                                                                                                                                                                |
| 47.                                                                                  | (RCT or "at random" or (random* near/3 (assign* or allocat* or control* or crossover or cross-over or design* or divide* or division or number)))                                                                                                                                                                                                                                                                                                                                                                                                                                                                                                                                                                                                                                                                                                                                                                                                           |
| 48.                                                                                  | ((control* near/2 (trial or study or group)) and (placebo or waitlist* or wait* list* or ((treatment or care) near/2 usual) or (no intervention* or non intervention* or non-intervention* or without any intervention*)))                                                                                                                                                                                                                                                                                                                                                                                                                                                                                                                                                                                                                                                                                                                                  |
| 49.                                                                                  | ((single or double or triple or treble) near/2 (blind* or mask* or dummy))                                                                                                                                                                                                                                                                                                                                                                                                                                                                                                                                                                                                                                                                                                                                                                                                                                                                                  |
| 50.                                                                                  | 46 or 47 or 48 or 49                                                                                                                                                                                                                                                                                                                                                                                                                                                                                                                                                                                                                                                                                                                                                                                                                                                                                                                                        |
| 51.                                                                                  | 33 and 37 and 50                                                                                                                                                                                                                                                                                                                                                                                                                                                                                                                                                                                                                                                                                                                                                                                                                                                                                                                                            |

## Additional file 1 – search strategies of electronic databases

|                                                                                                                              |           |
|------------------------------------------------------------------------------------------------------------------------------|-----------|
| 52.                                                                                                                          | 51 not 45 |
| If no field code was determined, "All text" have been searched (e.g. search line 46); ti: title; ab: abstract; kw: keywords. |           |

### OID PsycINFO will be searched using the following terms:

| <b>[Intervention]</b>                                                                |                                                                                                                                                                                                                                                                                                                                                                                                                                                                                                                                                    |
|--------------------------------------------------------------------------------------|----------------------------------------------------------------------------------------------------------------------------------------------------------------------------------------------------------------------------------------------------------------------------------------------------------------------------------------------------------------------------------------------------------------------------------------------------------------------------------------------------------------------------------------------------|
| 1.                                                                                   | exp Internet/                                                                                                                                                                                                                                                                                                                                                                                                                                                                                                                                      |
| 2.                                                                                   | exp Telecommunications Media/                                                                                                                                                                                                                                                                                                                                                                                                                                                                                                                      |
| 3.                                                                                   | exp Computer Assisted Instruction/                                                                                                                                                                                                                                                                                                                                                                                                                                                                                                                 |
| 4.                                                                                   | exp Computer Assisted Therapy/                                                                                                                                                                                                                                                                                                                                                                                                                                                                                                                     |
| 5.                                                                                   | (telephon* or teleconferencing or teleconference* or teleconsult* or telehealth or tele-health or teletherap* or telecomm* or telemed* or telemonitor* or telephone or telepsych* or telephone-administered or "cell phone" or cellphone or phone*).tw.                                                                                                                                                                                                                                                                                            |
| 6.                                                                                   | (app or application).tw.                                                                                                                                                                                                                                                                                                                                                                                                                                                                                                                           |
| 7.                                                                                   | (internet or internet-delivered or internet-based or "internet-based CBT" or "internet-based cognitive behavior therap*" or internet-guided or interapy).tw.                                                                                                                                                                                                                                                                                                                                                                                       |
| 8.                                                                                   | (online* or on-line or cyber*).tw.                                                                                                                                                                                                                                                                                                                                                                                                                                                                                                                 |
| 9.                                                                                   | ("Therapy, Computer-Assisted" or computer-based or computer* or computer-administered or computer-assisted or computer-aided or computer-delivered).tw.                                                                                                                                                                                                                                                                                                                                                                                            |
| 10.                                                                                  | (website or web or web-based or www).tw.                                                                                                                                                                                                                                                                                                                                                                                                                                                                                                           |
| 11.                                                                                  | (videoconferencing or videophone* or videoconference* or skype).tw.                                                                                                                                                                                                                                                                                                                                                                                                                                                                                |
| 12.                                                                                  | ("electronic mail" or "electronic and mail" or "electronic and communication" or "electronic health*" or e-mail* or email*).tw.                                                                                                                                                                                                                                                                                                                                                                                                                    |
| 13.                                                                                  | (virtual* or vr).tw.                                                                                                                                                                                                                                                                                                                                                                                                                                                                                                                               |
| 14.                                                                                  | ("augmented reality" or ar).tw.                                                                                                                                                                                                                                                                                                                                                                                                                                                                                                                    |
| 15.                                                                                  | ("text and messag*" or SMS or "short and messag*" or "text messag*" or texting).tw.                                                                                                                                                                                                                                                                                                                                                                                                                                                                |
| 16.                                                                                  | (emedicine or ehealth or e-medicine or e-health or mhealth or m-health or e-portal or eportal or etherap* or e-therap*).tw.                                                                                                                                                                                                                                                                                                                                                                                                                        |
| 17.                                                                                  | ("technolog*-assisted" or "technolog*-based" or technolog* or "technology-based intervention").tw.                                                                                                                                                                                                                                                                                                                                                                                                                                                 |
| 18.                                                                                  | (interactive or multi-media or multimedia).tw.                                                                                                                                                                                                                                                                                                                                                                                                                                                                                                     |
| 19.                                                                                  | (android or iOS or windows or software).tw.                                                                                                                                                                                                                                                                                                                                                                                                                                                                                                        |
| 20.                                                                                  | ict.tw.                                                                                                                                                                                                                                                                                                                                                                                                                                                                                                                                            |
| 21.                                                                                  | (ipad or i-pad or iphone or i-phone or ipod or i-pod).tw.                                                                                                                                                                                                                                                                                                                                                                                                                                                                                          |
| 22.                                                                                  | ("social medi*" or "social network* site*" or facebook or blog or chat or forum* or "chat group").tw.                                                                                                                                                                                                                                                                                                                                                                                                                                              |
| 23.                                                                                  | (cCBT or iCBT or iact or bcbt).tw.                                                                                                                                                                                                                                                                                                                                                                                                                                                                                                                 |
| 24.                                                                                  | (gaming or "instant messag*" or "smart phone" or smartphone or mobile or smartphone-supported or "with remind*").tw.                                                                                                                                                                                                                                                                                                                                                                                                                               |
| 25.                                                                                  | (podcast or audio*).tw.                                                                                                                                                                                                                                                                                                                                                                                                                                                                                                                            |
| 26.                                                                                  | (personal digital assistant or PDA or palmtop).tw.                                                                                                                                                                                                                                                                                                                                                                                                                                                                                                 |
| 27.                                                                                  | (CD-ROM or DVD).tw.                                                                                                                                                                                                                                                                                                                                                                                                                                                                                                                                |
| 28.                                                                                  | digital.tw.                                                                                                                                                                                                                                                                                                                                                                                                                                                                                                                                        |
| 29.                                                                                  | ("face to face versus" or ("blended therap*" or "blended-therap*" or blended) adj5 therap*).tw.                                                                                                                                                                                                                                                                                                                                                                                                                                                    |
| 30.                                                                                  | (distance or remote*).tw.                                                                                                                                                                                                                                                                                                                                                                                                                                                                                                                          |
| 31.                                                                                  | ("Keeping the blues away" or deprexis or "beating the blues" or "overcoming depression" or odin or "restoring the balance" or MoodGym or "Mood Gym" or Moodhelper or "mood helper" or Sparx or "mood enhancer" or moodenhancer or "get.on mood enhancer" or sadnessprogram or subgap or "master your mood" or mym or e-coach or "colour your life" or cyl or "kleur je leven" or psyfit or "getting started" or "mood manager" or moodmanager or pst or "livinglifetothefull" or lltf or "project uplift" or "the brighten your mood program").tw. |
| 32.                                                                                  | depression*.tw.                                                                                                                                                                                                                                                                                                                                                                                                                                                                                                                                    |
| 33.                                                                                  | swedish.lg.                                                                                                                                                                                                                                                                                                                                                                                                                                                                                                                                        |
| 34.                                                                                  | 32 and 33                                                                                                                                                                                                                                                                                                                                                                                                                                                                                                                                          |
| 35.                                                                                  | 1 or 2 or 3 or 4 or 5 or 6 or 7 or 8 or 9 or 10 or 11 or 12 or 13 or 14 or 15 or 16 or 17 or 18 or 19 or 20 or 21 or 22 or 23 or 24 or 25 or 26 or 27 or 28 or 29 or 30 or 31 or 34                                                                                                                                                                                                                                                                                                                                                                |
| <b>[Population/Condition]</b>                                                        |                                                                                                                                                                                                                                                                                                                                                                                                                                                                                                                                                    |
| 36.                                                                                  | exp DEPRESSION (EMOTION)/                                                                                                                                                                                                                                                                                                                                                                                                                                                                                                                          |
| 37.                                                                                  | exp MAJOR DEPRESSION/                                                                                                                                                                                                                                                                                                                                                                                                                                                                                                                              |
| 38.                                                                                  | (dysthymi* or depression or depressed or depressive or "mood disorder" or "affective disorder").tw.                                                                                                                                                                                                                                                                                                                                                                                                                                                |
| 39.                                                                                  | 36 or 37 or 38                                                                                                                                                                                                                                                                                                                                                                                                                                                                                                                                     |
| <b>[Physical conditions (38-43) and age group (44) served as exclusion criteria]</b> |                                                                                                                                                                                                                                                                                                                                                                                                                                                                                                                                                    |

## Additional file 1 – search strategies of electronic databases

|                                                                                                                                             |                                                                                                                                                                                                                                                                                                                                                                                                                                                                                                                                                                                                                                                                                                                                                                                                                                                                                                                                                   |
|---------------------------------------------------------------------------------------------------------------------------------------------|---------------------------------------------------------------------------------------------------------------------------------------------------------------------------------------------------------------------------------------------------------------------------------------------------------------------------------------------------------------------------------------------------------------------------------------------------------------------------------------------------------------------------------------------------------------------------------------------------------------------------------------------------------------------------------------------------------------------------------------------------------------------------------------------------------------------------------------------------------------------------------------------------------------------------------------------------|
| 40.                                                                                                                                         | ("physical* ill*" or "medical* ill*" or "chronic disease" or (chronic* adj (ill* or condition*1 or disease* or disorder* or health)) or (long term adj (condition*1 or sick*)) or "medical* morbid*" or (medical* adj (comorbid* or comorbid*)) or multimorbid* or (multi* adj (morbid* or "co morbid*" or comorbid* or physical))).ti.                                                                                                                                                                                                                                                                                                                                                                                                                                                                                                                                                                                                           |
| 41.                                                                                                                                         | (AIDS or allerg* or angina or aneurysm or "ankylosing spondylitis" or arthropath* or arthriti* or arthrosis or arthroses or asthma* or "atrial fibrillation" or "autoimmune disease*" or "back pain" or blindness or "brain atroph*" or (bone adj (disease* or disorder*)) or ((bronchi* or bowel) adj (disease* or disorder*)) or bypass or (cancer or neoplasm* or neoplastic or malignan*) or (cardiac adj (arrest or arrhythmia* or surg*)) or cardiomyopath* or ((cardiovascular or coronary) adj2 (disease* or disorder* or event*)) or "cerebral palsy" or (cerebrovascular adj2 (disease* or disorder* or event*)) or "chronic obstructive" or COPD or pain or cirrhosis or colitis or "congenital abnormalit*" or (congenial adj2 (disease or disorder*)) or coxarthrosis or Crohn* or Cushing* or "cystic fibrosis" or cystitis).ti                                                                                                     |
| 42.                                                                                                                                         | (deaf* or deformit* or disabled or (physical adj (deform* or disab* or impair*)) or dermatitis or dermato* or dorsopath* or diabet* or "digestive system*" or duoden* or dystonia or eczema or (endocrine adj (disease* or disorder*)) or enuresis or epilep* or "eye disease*" or ("fatigue syndrome" or "chronic fatigue") or fibromyalgia or fibrosis or "food hypersensitivity" or (gastr* adj (disease* or disorder*)) or gastritis or "genetic disorder*" or gout or (glomerul* adj (disease* or disorder*)) or headache* or ((h?emic or lymph*) adj (disease* or disorder*)) or h?ematuria or h?emophili* or h?emorrhag* or ((hearing or visual or vision) adj2 (aid* or impair* or loss)) or hemiplegi* or hepatitis or h?emodialysis or ((renal or kidney) adj (disease* or disorder* or failure)) or (heart adj (disease* or disorder* or failure or surg*)) or HIV or "human immunodeficiency virus" or hypertensi* or hypotensi*).ti. |
| 43.                                                                                                                                         | ("inflammatory disease*" or incontinen* or "irritable bowel" or isch?emi* or (joint adj (disease* or disorder*)) or kyphosis or leuk?emia or ((liver or hepatic) adj (disease* or disorder* or failure)) or lordosis or "lung disease*" or "lupus erythemat*" or lymphoma or "macular degeneration" or migraine* or "movement disorder*" or musculoskeletal or necrotizing or nephrotic* or neuromuscular or "multiple sclerosis" or myeloma).ti.                                                                                                                                                                                                                                                                                                                                                                                                                                                                                                 |
| 44.                                                                                                                                         | ("nephrotic syndrome" or ((nutritional or metabolic) adj (disease* or disorder or syndrome*)) or (organ* adj2 (transplant* or recipient*)) or (neurological adj (disease* or disorder*)) or occlusion* or obesity or obese or orthop?edic* or osteo* or "otitis media" or otorhinolaryngology* or otosclerosis or pancrea* or papulosquamous or paraplegi* or parkinson* or "peripheral vascular" or "pick disease*" or pneumoconiosis or polio* or polyarthropath* or polyarteritis or polyarthrosis or polyneuropath* or psoriasis or parapsoriasis or (pulmonary adj2 (disease* or disorder))).ti.                                                                                                                                                                                                                                                                                                                                             |
| 45.                                                                                                                                         | ((respiratory adj (disease* or disorder*)) or retinopathy or rheumat* or sclerosis or scoliosis or "sickle cell an?emia" or ((skin or "connective tissue") adj (disease* or disorder*)) or ("sleep disorder*" or "sleep apn?ea" or insomnia* or dyssomnia* or hypersomnia*) or "spina bifida" or "spinal muscular atrophy" or spondylo* or stenosis* or stoma* or (stroke or strokes or "cerebral infarct*") or tetraplegi* or ((thyroid adj (disease* or disorder* or dysfunction*)) or hyperthyroidism or hypothyroidism) or tuberculosis or (systemic adj (disorder* or disease*)) or ulcer* or (urogenital adj (disease* or disorder*)) or vasculopath* or (vascular adj (disease* or disorder*)) or vestibular or ((virus or viral) adj disease)).ti.                                                                                                                                                                                        |
| 46.                                                                                                                                         | (child* or boy* or girl* or infant* or juvenil* or minors or paediatric* or pediatric* or school* or preschool* or pre-school* or kindergarten or nursery or preadolesc* or pre-adolesc* or pubert* or pubescen* or prepube* or prepube* or high-school or teen*).ti.                                                                                                                                                                                                                                                                                                                                                                                                                                                                                                                                                                                                                                                                             |
| 47.                                                                                                                                         | 40 or 41 or 42 or 43 or 44 or 45 or 46                                                                                                                                                                                                                                                                                                                                                                                                                                                                                                                                                                                                                                                                                                                                                                                                                                                                                                            |
| <b>[Study design]</b>                                                                                                                       |                                                                                                                                                                                                                                                                                                                                                                                                                                                                                                                                                                                                                                                                                                                                                                                                                                                                                                                                                   |
| 48.                                                                                                                                         | (randomi?ed or randomi?ation or randomi?ing).af.                                                                                                                                                                                                                                                                                                                                                                                                                                                                                                                                                                                                                                                                                                                                                                                                                                                                                                  |
| 49.                                                                                                                                         | (RCT or "at random" or (random* adj3 (assign* or allocat* or control* or crossover or cross-over or design* or divide* or division or number))).af.                                                                                                                                                                                                                                                                                                                                                                                                                                                                                                                                                                                                                                                                                                                                                                                               |
| 50.                                                                                                                                         | ((control* adj2 (trial or study or group)) and (placebo or waitlist* or wait* list* or ((treatment or care) adj2 usual) or (no intervention* or non intervention* or non-intervention* or without any intervention))).af.                                                                                                                                                                                                                                                                                                                                                                                                                                                                                                                                                                                                                                                                                                                         |
| 51.                                                                                                                                         | ((single or double or triple or treble) adj2 (blind* or mask* or dummy)).af.                                                                                                                                                                                                                                                                                                                                                                                                                                                                                                                                                                                                                                                                                                                                                                                                                                                                      |
| 52.                                                                                                                                         | 48 or 49 or 50 or 51                                                                                                                                                                                                                                                                                                                                                                                                                                                                                                                                                                                                                                                                                                                                                                                                                                                                                                                              |
| 53.                                                                                                                                         | 35 and 39 and 52                                                                                                                                                                                                                                                                                                                                                                                                                                                                                                                                                                                                                                                                                                                                                                                                                                                                                                                                  |
| 54.                                                                                                                                         | 53 not 47                                                                                                                                                                                                                                                                                                                                                                                                                                                                                                                                                                                                                                                                                                                                                                                                                                                                                                                                         |
| tw: textword, includes multiple fields as follows: table of contents (tc), title (ti), abstract (ab) and key concepts (id); af: all fields. |                                                                                                                                                                                                                                                                                                                                                                                                                                                                                                                                                                                                                                                                                                                                                                                                                                                                                                                                                   |

## OID Medline will be searched using the following terms:

|                       |                                    |
|-----------------------|------------------------------------|
| <b>[Intervention]</b> |                                    |
| 1.                    | exp Internet/                      |
| 2.                    | exp Telecommunications/            |
| 3.                    | exp Computer-Assisted Instruction/ |
| 4.                    | Therapy, Computer Assisted/        |
| 5.                    | exp Remote Consultation/           |

## Additional file 1 – search strategies of electronic databases

|                                                                                      |                                                                                                                                                                                                                                                                                                                                                                                                                                                                                                                                                                                                                                                                                                                                                                                                                                               |
|--------------------------------------------------------------------------------------|-----------------------------------------------------------------------------------------------------------------------------------------------------------------------------------------------------------------------------------------------------------------------------------------------------------------------------------------------------------------------------------------------------------------------------------------------------------------------------------------------------------------------------------------------------------------------------------------------------------------------------------------------------------------------------------------------------------------------------------------------------------------------------------------------------------------------------------------------|
| 6.                                                                                   | (telephon* or teleconferencing or teleconference* or teleconsult* or telehealth or tele-health or teletherap* or telecomm* or telemed* or telemonitor* or telephone or telepsych* or telephone-administered or "cell phone" or cellphone or phone*).ti,ab,kf.                                                                                                                                                                                                                                                                                                                                                                                                                                                                                                                                                                                 |
| 7.                                                                                   | (app or application).ti,ab,kf.                                                                                                                                                                                                                                                                                                                                                                                                                                                                                                                                                                                                                                                                                                                                                                                                                |
| 8.                                                                                   | (internet or internet-delivered or internet-based or "internet-based CBT" or "internet-based cognitive behavior* therap*" or internet-guided or interapy).ti,ab,kf.                                                                                                                                                                                                                                                                                                                                                                                                                                                                                                                                                                                                                                                                           |
| 9.                                                                                   | (online* or on-line or cyber*).ti,ab,kf.                                                                                                                                                                                                                                                                                                                                                                                                                                                                                                                                                                                                                                                                                                                                                                                                      |
| 10.                                                                                  | ("Therapy, Computer-Assisted" or computer-based or computer* or computer-administered or computer-assisted or computer-aided or computer-delivered).ti,ab,kf.                                                                                                                                                                                                                                                                                                                                                                                                                                                                                                                                                                                                                                                                                 |
| 11.                                                                                  | (website or web or web-based or www).ti,ab,kf.                                                                                                                                                                                                                                                                                                                                                                                                                                                                                                                                                                                                                                                                                                                                                                                                |
| 12.                                                                                  | (videoconferencing or videophone* or videoconference* or skype).ti,ab,kf.                                                                                                                                                                                                                                                                                                                                                                                                                                                                                                                                                                                                                                                                                                                                                                     |
| 13.                                                                                  | ("electronic mail" or "electronic and mail" or "electronic and communication" or "electronic health*" or e-mail* or email*).ti,ab,kf.                                                                                                                                                                                                                                                                                                                                                                                                                                                                                                                                                                                                                                                                                                         |
| 14.                                                                                  | (virtual* or vr).ti,ab,kf.                                                                                                                                                                                                                                                                                                                                                                                                                                                                                                                                                                                                                                                                                                                                                                                                                    |
| 15.                                                                                  | ("augmented reality" or ar).ti,ab,kf.                                                                                                                                                                                                                                                                                                                                                                                                                                                                                                                                                                                                                                                                                                                                                                                                         |
| 16.                                                                                  | ("text and messag*" or SMS or "short and messag*" or "text messag*" or texting).ti,ab,kf.                                                                                                                                                                                                                                                                                                                                                                                                                                                                                                                                                                                                                                                                                                                                                     |
| 17.                                                                                  | (emedicine or ehealth or e-medicine or e-health or mhealth or m-health or e-portal or eportal or etherap* or e-therap*).ti,ab,kf.                                                                                                                                                                                                                                                                                                                                                                                                                                                                                                                                                                                                                                                                                                             |
| 18.                                                                                  | ("technolog*-assisted" or "technolog*-based" or technolog* or "technology-based intervention").ti,ab,kf.                                                                                                                                                                                                                                                                                                                                                                                                                                                                                                                                                                                                                                                                                                                                      |
| 19.                                                                                  | (interactive or multi-media or multimedia).ti,ab,kf.                                                                                                                                                                                                                                                                                                                                                                                                                                                                                                                                                                                                                                                                                                                                                                                          |
| 20.                                                                                  | (android or iOS or windows or software).ti,ab,kf.                                                                                                                                                                                                                                                                                                                                                                                                                                                                                                                                                                                                                                                                                                                                                                                             |
| 21.                                                                                  | ict.ti,ab,kf.                                                                                                                                                                                                                                                                                                                                                                                                                                                                                                                                                                                                                                                                                                                                                                                                                                 |
| 22.                                                                                  | (ipad or i-pad or iphone or i-phone or ipod or i-pod).ti,ab,kf.                                                                                                                                                                                                                                                                                                                                                                                                                                                                                                                                                                                                                                                                                                                                                                               |
| 23.                                                                                  | ("social medi*" or "social network* site*" or facebook or blog or chat or forum* or "chat group").ti,ab,kf.                                                                                                                                                                                                                                                                                                                                                                                                                                                                                                                                                                                                                                                                                                                                   |
| 24.                                                                                  | (cCBT or iCBT or iact or bcbt).ti,ab,kf.                                                                                                                                                                                                                                                                                                                                                                                                                                                                                                                                                                                                                                                                                                                                                                                                      |
| 25.                                                                                  | (gaming or "instant messag*" or "smart phone" or smartphone or mobile or smartphone-supported or "with remind*").ti,ab,kf.                                                                                                                                                                                                                                                                                                                                                                                                                                                                                                                                                                                                                                                                                                                    |
| 26.                                                                                  | (podcast or audio*).ti,ab,kf.                                                                                                                                                                                                                                                                                                                                                                                                                                                                                                                                                                                                                                                                                                                                                                                                                 |
| 27.                                                                                  | (personal digital assistant or PDA or palmtop).ti,ab,kf.                                                                                                                                                                                                                                                                                                                                                                                                                                                                                                                                                                                                                                                                                                                                                                                      |
| 28.                                                                                  | (CD-ROM or DVD).ti,ab,kf.                                                                                                                                                                                                                                                                                                                                                                                                                                                                                                                                                                                                                                                                                                                                                                                                                     |
| 29.                                                                                  | digital.ti,ab,kf.                                                                                                                                                                                                                                                                                                                                                                                                                                                                                                                                                                                                                                                                                                                                                                                                                             |
| 30.                                                                                  | ("face to face versus" or ("blended therap*" or "blended-therap*" or blended) adj5 therap*).ti,ab,kf.                                                                                                                                                                                                                                                                                                                                                                                                                                                                                                                                                                                                                                                                                                                                         |
| 31.                                                                                  | (distance or remote*).ti,ab,kf.                                                                                                                                                                                                                                                                                                                                                                                                                                                                                                                                                                                                                                                                                                                                                                                                               |
| 32.                                                                                  | ("Keeping the blues away" or deprexis or "beating the blues" or "overcoming depression" or odin or "restoring the balance" or MoodGym or "Mood Gym" or Moodhelper or "mood helper" or Sparx or "mood enhancer" or moodenhancer or "get.on mood enhancer" or sadnessprogram or subgap or "master your mood" or mym or e-coach or "colour your life" or cyl or "kleur je leven" or psyfit or "getting started" or "mood manager" or moodmanager or pst or "livinglifetothefull" or lltf or "project uplift" or "the brighten your mood program").ti,ab,kf                                                                                                                                                                                                                                                                                       |
| 33.                                                                                  | depression*.ti,ab,kf.                                                                                                                                                                                                                                                                                                                                                                                                                                                                                                                                                                                                                                                                                                                                                                                                                         |
| 34.                                                                                  | swedish.lg.                                                                                                                                                                                                                                                                                                                                                                                                                                                                                                                                                                                                                                                                                                                                                                                                                                   |
| 35.                                                                                  | 33 and 34                                                                                                                                                                                                                                                                                                                                                                                                                                                                                                                                                                                                                                                                                                                                                                                                                                     |
| 36.                                                                                  | 1 or 2 or 3 or 4 or 5 or 6 or 7 or 8 or 9 or 10 or 11 or 12 or 13 or 14 or 15 or 16 or 17 or 18 or 19 or 20 or 21 or 22 or 23 or 24 or 25 or 26 or 27 or 28 or 29 or 30 or 31 or 32 or 35                                                                                                                                                                                                                                                                                                                                                                                                                                                                                                                                                                                                                                                     |
| <b>[Population/Condition]</b>                                                        |                                                                                                                                                                                                                                                                                                                                                                                                                                                                                                                                                                                                                                                                                                                                                                                                                                               |
| 37.                                                                                  | exp Depression/                                                                                                                                                                                                                                                                                                                                                                                                                                                                                                                                                                                                                                                                                                                                                                                                                               |
| 38.                                                                                  | exp Depressive Dirsorder/                                                                                                                                                                                                                                                                                                                                                                                                                                                                                                                                                                                                                                                                                                                                                                                                                     |
| 39.                                                                                  | (dysthymi* or depression or depressed or depressive or "mood disorder" or "affective disorder").ti,ab,kf.                                                                                                                                                                                                                                                                                                                                                                                                                                                                                                                                                                                                                                                                                                                                     |
| 40.                                                                                  | 37 or 38 or 39                                                                                                                                                                                                                                                                                                                                                                                                                                                                                                                                                                                                                                                                                                                                                                                                                                |
| <b>[Physical conditions (38-43) and age group (44) served as exclusion criteria]</b> |                                                                                                                                                                                                                                                                                                                                                                                                                                                                                                                                                                                                                                                                                                                                                                                                                                               |
| 41.                                                                                  | ("physical* ill*" or "medical* ill*" or "chronic disease" or (chronic* adj (ill* or condition*1 or disease* or disorder* or health)) or (long term adj (condition*1 or sick*)) or "medical* morbid*" or (medical* adj (comorbid* or co morbid*)) or multimorbid* or (multi* adj (morbid* or "co morbid*" or comorbid* or physical))).ti.                                                                                                                                                                                                                                                                                                                                                                                                                                                                                                      |
| 42.                                                                                  | (AIDS or allerg* or angina or aneurysm or "ankylosing spondylitis" or arthropath* or arthriti* or arthrosis or arthroses or asthma* or "atrial fibrillation" or "autoimmune disease*" or "back pain" or blindness or "brain atroph*" or (bone adj (disease* or disorder*)) or ((bronchi* or bowel) adj (disease* or disorder*)) or bypass or (cancer or neoplasm* or neoplastic or malignan*) or (cardiac adj (arrest or arrhythmia* or surg*)) or cardiomyopath* or ((cardiovascular or coronary) adj2 (disease* or disorder* or event*)) or "cerebral palsy" or (cerebrovascular adj2 (disease* or disorder* or event*)) or "chronic obstructive" or COPD or pain or cirrhosis or colitis or "congenital abnormalit*" or (congenial adj2 (disease or disorder*)) or coxarthrosis or Crohn* or Cushing* or "cystic fibrosis" or cystitis).ti |
| 43.                                                                                  | (deaf* or deformit* or disabled or (physical adj (deform* or disab* or impair*)) or dermatitis or dermato* or dorsopath* or diabet* or "digestive system*" or duoden* or dystonia or eczema or (endocrine adj (disease* or                                                                                                                                                                                                                                                                                                                                                                                                                                                                                                                                                                                                                    |

## Additional file 1 – search strategies of electronic databases

|                                                               |                                                                                                                                                                                                                                                                                                                                                                                                                                                                                                                                                                                                                                                                                                                                                            |
|---------------------------------------------------------------|------------------------------------------------------------------------------------------------------------------------------------------------------------------------------------------------------------------------------------------------------------------------------------------------------------------------------------------------------------------------------------------------------------------------------------------------------------------------------------------------------------------------------------------------------------------------------------------------------------------------------------------------------------------------------------------------------------------------------------------------------------|
|                                                               | disorder*) or enuresis or epilep* or "eye disease*" or ("fatigue syndrome" or "chronic fatigue") or fibromyalgia or fibrosis or "food hypersensitivity" or (gastr* adj (disease* or disorder*)) or gastritis or "genetic disorder*" or gout or (glomerul* adj (disease* or disorder*)) or headache* or ((h?emic or lymph*) adj (disease* or disorder*)) or h?ematuria or h?emophili* or h?emorrhag* or ((hearing or visual or vision) adj2 (aid* or impair* or loss)) or hemiplegi* or hepatitis or h?emodialysis or ((renal or kidney) adj (disease* or disorder* or failure)) or (heart adj (disease* or disorder* or failure or surg*)) or HIV or "human immunodeficiency virus" or hypertensi* or hypotensi*).ti.                                      |
| 44.                                                           | ("inflammatory disease*" or incontinen* or "irritable bowel" or isch?emi* or (joint adj (disease* or disorder*)) or kyphosis or leuk? emia or ((liver or hepatic) adj (disease* or disorder* or failure)) or lordosis or "lung disease*" or "lupus erythemat*" or lymphoma or "macular degeneration" or migraine* or "movement disorder*" or musculoskeletal or necrotizing or nephrotic* or neuromuscular or "multiple sclerosis" or myeloma).ti.                                                                                                                                                                                                                                                                                                         |
| 45.                                                           | ("nephrotic syndrome" or ((nutritional or metabolic) adj (disease* or disorder or syndrome*)) or (organ* adj2 (transplant* or recipient*)) or (neurological adj (disease* or disorder*)) or occlusion* or obesity or obese or orthop?edic* or osteo* or "otitis media" or otorhinolaryngology* or otosclerosis or pancrea* or papulosquamous or paraplegi* or parkinson* or "peripheral vascular" or "pick disease*" or pneumoconiosis or polio* or polyarthropath* or polyarteritis or polyarthrosis or polyneuropath* or psoriasis or parapsoriasis or (pulmonary adj2 (disease* or disorder*))).ti.                                                                                                                                                     |
| 46.                                                           | ((respiratory adj (disease* or disorder*)) or retinopathy or rheumat* or sclerosis or scoliosis or "sickle cell an?emia" or ((skin or "connective tissue") adj (disease* or disorder*)) or ("sleep disorder*" or "sleep apn?ea" or insomnia* or dyssomnia* or hypersomnia*) or "spina bifida" or "spinal muscular atrophy" or spondylo* or stenosis* or stoma* or (stroke or strokes or "cerebral infarct*") or tetraplegi* or ((thyroid adj (disease* or disorder* or dysfunction*)) or hyperthyroidism or hypothyroidism) or tuberculosis or (systemic adj (disorder* or disease*)) or ulcer* or (urogenital adj (disease* or disorder*)) or vasculopath* or (vascular adj (disease* or disorder*)) or vestibular or ((virus or viral) adj disease)).ti. |
| 47.                                                           | (child* or boy* or girl* or infant* or juvenil* or minors or paediatric* or pediatric* or school* or preschool* or pre-school* or kindergarten or nursery or preadolesc* or pre-adolesc* or pubert* or pubescen* or prepube* or pre-pube* or high-school or teen*).ti.                                                                                                                                                                                                                                                                                                                                                                                                                                                                                     |
| 48.                                                           | 41 or 42 or 43 or 44 or 45 or 46 or 47                                                                                                                                                                                                                                                                                                                                                                                                                                                                                                                                                                                                                                                                                                                     |
| <b>[Study design]</b>                                         |                                                                                                                                                                                                                                                                                                                                                                                                                                                                                                                                                                                                                                                                                                                                                            |
| 49.                                                           | (randomi?ed or randomi?ation or randomi?ing).af.                                                                                                                                                                                                                                                                                                                                                                                                                                                                                                                                                                                                                                                                                                           |
| 50.                                                           | (RCT or "at random" or (random* adj3 (assign* or allocat* or control* or crossover or cross-over or design* or divide* or division or number))).af.                                                                                                                                                                                                                                                                                                                                                                                                                                                                                                                                                                                                        |
| 51.                                                           | ((control* adj2 (trial or study or group)) and (placebo or waitlist* or wait* list* or ((treatment or care) adj2 usual) or (no intervention* or non intervention* or non-intervention* or without any intervention*))).af.                                                                                                                                                                                                                                                                                                                                                                                                                                                                                                                                 |
| 52.                                                           | ((single or double or triple or treble) adj2 (blind* or mask* or dummy)).af.                                                                                                                                                                                                                                                                                                                                                                                                                                                                                                                                                                                                                                                                               |
| 53.                                                           | 49 or 50 or 51 or 52                                                                                                                                                                                                                                                                                                                                                                                                                                                                                                                                                                                                                                                                                                                                       |
| 54.                                                           | 35 and 40 and 53                                                                                                                                                                                                                                                                                                                                                                                                                                                                                                                                                                                                                                                                                                                                           |
| 55.                                                           | 54 not 48                                                                                                                                                                                                                                                                                                                                                                                                                                                                                                                                                                                                                                                                                                                                                  |
| ti: title; ab: abstract; kf: keyword heading; af: all fields. |                                                                                                                                                                                                                                                                                                                                                                                                                                                                                                                                                                                                                                                                                                                                                            |

## OID PsyNDEX will be searched using the following terms:

|                       |                                                                                                                                                                                                                                                                  |
|-----------------------|------------------------------------------------------------------------------------------------------------------------------------------------------------------------------------------------------------------------------------------------------------------|
| <b>[Intervention]</b> |                                                                                                                                                                                                                                                                  |
| 1.                    | exp Internet/                                                                                                                                                                                                                                                    |
| 2.                    | exp Telecommunications Media/                                                                                                                                                                                                                                    |
| 3.                    | exp Computer Assisted Instruction/                                                                                                                                                                                                                               |
| 4.                    | exp Computer Assisted Therapy/                                                                                                                                                                                                                                   |
| 5.                    | (telephon* or teleconferencing or teleconference* or teleconsult* or telehealth or tele-health or teletherap* or telecomm* or telemed* or telemonitor* or telephone or telepsych* or telephone-administered or "cell phone" or cellphone or phone*).ab,ti,kp,fw. |
| 6.                    | (app or application).ab,ti,kp,fw.                                                                                                                                                                                                                                |
| 7.                    | (internet or internet-delivered or internet-based or "internet-based CBT" or "internet-based cognitive behavior* therap*" or internet-guided or interapy).ab,ti,kp,fw.                                                                                           |
| 8.                    | (online* or on-line or cyber*).ab,ti,kp,fw.                                                                                                                                                                                                                      |
| 9.                    | ("Therapy, Computer-Assisted" or computer-based or computer* or computer-administered or computer-assisted or computer-aided or computer-delivered).ab,ti,kp,fw.                                                                                                 |
| 10.                   | (website or web or web-based or www).ab,ti,kp,fw.                                                                                                                                                                                                                |
| 11.                   | (videoconferencing or videophone* or videoconference* or skype).ab,ti,kp,fw.                                                                                                                                                                                     |
| 12.                   | ("electronic mail" or "electronic and mail" or "electronic and communication" or "electronic health*" or e-mail* or email*).ab,ti,kp,fw.                                                                                                                         |
| 13.                   | (virtual* or vr).ab,ti,kp,fw.                                                                                                                                                                                                                                    |

Additional file 1 – search strategies of electronic databases

|                                                                                      |                                                                                                                                                                                                                                                                                                                                                                                                                                                                                                                                                                                                                                                                                                                                                                                                                                                                                                                                                   |
|--------------------------------------------------------------------------------------|---------------------------------------------------------------------------------------------------------------------------------------------------------------------------------------------------------------------------------------------------------------------------------------------------------------------------------------------------------------------------------------------------------------------------------------------------------------------------------------------------------------------------------------------------------------------------------------------------------------------------------------------------------------------------------------------------------------------------------------------------------------------------------------------------------------------------------------------------------------------------------------------------------------------------------------------------|
| 14.                                                                                  | ("augmented reality" or ar).ab,ti,kp,fw.                                                                                                                                                                                                                                                                                                                                                                                                                                                                                                                                                                                                                                                                                                                                                                                                                                                                                                          |
| 15.                                                                                  | ("text and messag*" or SMS or "short and messag*" or "text messag*" or texting).ab,ti,kp,fw.                                                                                                                                                                                                                                                                                                                                                                                                                                                                                                                                                                                                                                                                                                                                                                                                                                                      |
| 16.                                                                                  | (emedicine or ehealth or e-medicine or e-health or mhealth or m-health or e-portal or eportal or etherap* or e-therap*).ab,ti,kp,fw.                                                                                                                                                                                                                                                                                                                                                                                                                                                                                                                                                                                                                                                                                                                                                                                                              |
| 17.                                                                                  | ("technolog*-assisted" or "technolog*-based" or technolog* or "technology-based intervention").ab,ti,kp,fw.                                                                                                                                                                                                                                                                                                                                                                                                                                                                                                                                                                                                                                                                                                                                                                                                                                       |
| 18.                                                                                  | (interactive or multi-media or multimedia).ab,ti,kp,fw.                                                                                                                                                                                                                                                                                                                                                                                                                                                                                                                                                                                                                                                                                                                                                                                                                                                                                           |
| 19.                                                                                  | (android or iOS or windows or software).ab,ti,kp,fw.                                                                                                                                                                                                                                                                                                                                                                                                                                                                                                                                                                                                                                                                                                                                                                                                                                                                                              |
| 20.                                                                                  | ict.ab,ti,kp,fw.                                                                                                                                                                                                                                                                                                                                                                                                                                                                                                                                                                                                                                                                                                                                                                                                                                                                                                                                  |
| 21.                                                                                  | (ipad or i-pad or iphone or i-phone or ipod or i-pod).ab,ti,kp,fw.                                                                                                                                                                                                                                                                                                                                                                                                                                                                                                                                                                                                                                                                                                                                                                                                                                                                                |
| 22.                                                                                  | ("social medi*" or "social network* site*" or facebook or blog or chat or forum* or "chat group").ab,ti,kp,fw.                                                                                                                                                                                                                                                                                                                                                                                                                                                                                                                                                                                                                                                                                                                                                                                                                                    |
| 23.                                                                                  | (cCBT or iCBT or iact or bcbt).ab,ti,kp,fw.                                                                                                                                                                                                                                                                                                                                                                                                                                                                                                                                                                                                                                                                                                                                                                                                                                                                                                       |
| 24.                                                                                  | (gaming or "instant messag*" or "smart phone" or smartphone or mobile or smartphone-supported or "with remind*").ab,ti,kp,fw.                                                                                                                                                                                                                                                                                                                                                                                                                                                                                                                                                                                                                                                                                                                                                                                                                     |
| 25.                                                                                  | (podcast or audio*).ab,ti,kp,fw.                                                                                                                                                                                                                                                                                                                                                                                                                                                                                                                                                                                                                                                                                                                                                                                                                                                                                                                  |
| 26.                                                                                  | (personal digital assistant or PDA or palmtop).ab,ti,kp,fw.                                                                                                                                                                                                                                                                                                                                                                                                                                                                                                                                                                                                                                                                                                                                                                                                                                                                                       |
| 27.                                                                                  | (CD-ROM or DVD).ab,ti,kp,fw.                                                                                                                                                                                                                                                                                                                                                                                                                                                                                                                                                                                                                                                                                                                                                                                                                                                                                                                      |
| 28.                                                                                  | digital.ab,ti,kp,fw.                                                                                                                                                                                                                                                                                                                                                                                                                                                                                                                                                                                                                                                                                                                                                                                                                                                                                                                              |
| 29.                                                                                  | ("face to face versus" or (("blended therap*" or "blended-therap*" or blended) adj5 therap*)).ab,ti,kp,fw.                                                                                                                                                                                                                                                                                                                                                                                                                                                                                                                                                                                                                                                                                                                                                                                                                                        |
| 30.                                                                                  | (distance or remote*).ab,ti,kp,fw.                                                                                                                                                                                                                                                                                                                                                                                                                                                                                                                                                                                                                                                                                                                                                                                                                                                                                                                |
| 31.                                                                                  | ("Keeping the blues away" or deprexis or "beating the blues" or "overcoming depression" or odin or "restoring the balance" or MoodGym or "Mood Gym" or Moodhelper or "mood helper" or Sparx or "mood enhancer" or moodenhancer or "get.on mood enhancer" or sadnessprogram or subgap or "master your mood" or mym or e-coach or "colour your life" or cyl or "kleur je leven" or psyfit or "getting started" or "mood manager" or moodmanager or pst or "livinglifetothefull" or lltf or "project uplift" or "the brighten your mood program").ab,ti,kp,fw.                                                                                                                                                                                                                                                                                                                                                                                       |
| 32.                                                                                  | depression*.ab,ti,kp,fw.                                                                                                                                                                                                                                                                                                                                                                                                                                                                                                                                                                                                                                                                                                                                                                                                                                                                                                                          |
| 33.                                                                                  | swedish.lg. swedish.lg                                                                                                                                                                                                                                                                                                                                                                                                                                                                                                                                                                                                                                                                                                                                                                                                                                                                                                                            |
| 34.                                                                                  | 32 and 33                                                                                                                                                                                                                                                                                                                                                                                                                                                                                                                                                                                                                                                                                                                                                                                                                                                                                                                                         |
| 35.                                                                                  | 1 or 2 or 3 or 4 or 5 or 6 or 7 or 8 or 9 or 10 or 11 or 12 or 13 or 14 or 15 or 16 or 17 or 18 or 19 or 20 or 21 or 22 or 23 or 24 or 25 or 26 or 27 or 28 or 29 or 30 or 31 or 34                                                                                                                                                                                                                                                                                                                                                                                                                                                                                                                                                                                                                                                                                                                                                               |
| <b>[Population/Condition]</b>                                                        |                                                                                                                                                                                                                                                                                                                                                                                                                                                                                                                                                                                                                                                                                                                                                                                                                                                                                                                                                   |
| 72.                                                                                  | exp "DEPRESSION (EMOTION)"/                                                                                                                                                                                                                                                                                                                                                                                                                                                                                                                                                                                                                                                                                                                                                                                                                                                                                                                       |
| 73.                                                                                  | exp MAJOR DEPRESSION/                                                                                                                                                                                                                                                                                                                                                                                                                                                                                                                                                                                                                                                                                                                                                                                                                                                                                                                             |
| 74.                                                                                  | (dysthymi* or depression or depressed or depressive or "mood disorder" or "affective disorder").ab,ti,kp,fw.                                                                                                                                                                                                                                                                                                                                                                                                                                                                                                                                                                                                                                                                                                                                                                                                                                      |
| 75.                                                                                  | 36 or 37 or 38                                                                                                                                                                                                                                                                                                                                                                                                                                                                                                                                                                                                                                                                                                                                                                                                                                                                                                                                    |
| <b>[Physical conditions (38-43) and age group (44) served as exclusion criteria]</b> |                                                                                                                                                                                                                                                                                                                                                                                                                                                                                                                                                                                                                                                                                                                                                                                                                                                                                                                                                   |
| 40.                                                                                  | ("physical* ill*" or "medical* ill*" or "chronic disease" or (chronic* adj (ill* or condition*1 or disease* or disorder* or health)) or (long term adj (condition*1 or sick*)) or "medical* morbid*" or (medical* adj (comorbid* or co morbid*)) or multimorbid* or (multi* adj (morbid* or "co morbid*" or comorbid* or physical))).ti.                                                                                                                                                                                                                                                                                                                                                                                                                                                                                                                                                                                                          |
| 41.                                                                                  | (AIDS or allerg* or angina or aneurysm or "ankylosing spondylitis" or arthropath* or arthriti* or arthrosis or arthroses or asthma* or "atrial fibrillation" or "autoimmune disease*" or "back pain" or blindness or "brain atroph*" or (bone adj (disease* or disorder*)) or ((bronchi* or bowel) adj (disease* or disorder*)) or bypass or (cancer or neoplasm* or neoplastic or malignan*) or (cardiac adj (arrest or arrhythmia* or surg*)) or cardiomyopath* or ((cardiovascular or coronary) adj2 (disease* or disorder* or event*)) or "cerebral palsy" or (cerebrovascular adj2 (disease* or disorder* or event*)) or "chronic obstructive" or COPD or pain or cirrhosis or colitis or "congenital abnormalit*" or (congenital adj2 (disease* or disorder*)) or coxarthrosis or Crohn* or Cushing* or "cystic fibrosis" or cystitis).ti                                                                                                   |
| 42.                                                                                  | (deaf* or deformit* or disabled or (physical adj (deform* or disab* or impair*)) or dermatitis or dermato* or dorsopath* or diabet* or "digestive system*" or duoden* or dystonia or eczema or (endocrine adj (disease* or disorder*)) or enuresis or epilep* or "eye disease*" or ("fatigue syndrome" or "chronic fatigue") or fibromyalgia or fibrosis or "food hypersensitivity" or (gastr* adj (disease* or disorder*)) or gastritis or "genetic disorder*" or gout or (glomerul* adj (disease* or disorder*)) or headache* or ((h?emic or lymph*) adj (disease* or disorder*)) or h?ematuria or h?emophili* or h?emorrhag* or ((hearing or visual or vision) adj2 (aid* or impair* or loss)) or hemiplegi* or hepatitis or h?emodialysis or ((renal or kidney) adj (disease* or disorder* or failure)) or (heart adj (disease* or disorder* or failure or surg*)) or HIV or "human immunodeficiency virus" or hypertensi* or hypotensi*).ti. |
| 43.                                                                                  | ("inflammatory disease*" or incontinen* or "irritable bowel" or isch?emi* or (joint adj (disease* or disorder*)) or kyphosis or leuk? emia or ((liver or hepatic) adj (disease* or disorder* or failure)) or lordosis or "lung disease*" or "lupus erythemat*" or lymphoma or "macular degeneration" or migraine* or "movement disorder*" or musculoskeletal or necrotizing or nephrotic* or neuromuscular or "multiple sclerosis" or myeloma).ti.                                                                                                                                                                                                                                                                                                                                                                                                                                                                                                |
| 44.                                                                                  | ("nephrotic syndrome" or ((nutritional or metabolic) adj (disease* or disorder* or syndrome*)) or (organ* adj2 (transplant* or recipient*)) or (neurological adj (disease* or disorder*)) or occlusion* or obesity or obese or                                                                                                                                                                                                                                                                                                                                                                                                                                                                                                                                                                                                                                                                                                                    |

## Additional file 1 – search strategies of electronic databases

|                                                                                                                                |                                                                                                                                                                                                                                                                                                                                                                                                                                                                                                                                                                                                                                                                                                                                                           |
|--------------------------------------------------------------------------------------------------------------------------------|-----------------------------------------------------------------------------------------------------------------------------------------------------------------------------------------------------------------------------------------------------------------------------------------------------------------------------------------------------------------------------------------------------------------------------------------------------------------------------------------------------------------------------------------------------------------------------------------------------------------------------------------------------------------------------------------------------------------------------------------------------------|
|                                                                                                                                | orthop?edic* or osteo* or "otitis media" or otorhinolaryngology* or otosclerosis or pancrea* or papulosquamous or paraplegi* or parkinson* or "peripheral vascular" or "pick disease*" or pneumoconiosis or polio* or polyarthropath* or polyarteritis or polyarthrosis or polyneuropath* or psoriasis or parapsoriasis or (pulmonary adj2 (disease* or disorder*)).ti.                                                                                                                                                                                                                                                                                                                                                                                   |
| 45.                                                                                                                            | ((respiratory adj (disease* or disorder*)) or retinopathy or rheumat* or sclerosis or scoliosis or "sickle cell an?emia" or ((skin or "connective tissue") adj (disease* or disorder*)) or ("sleep disorder*" or "sleep apn?ea" or insomnia* or dyssomnia* or hypersomnia*) or "spina bifida" or "spinal muscular atrophy" or spondylo* or stenosis* or stoma* or (stroke or strokes or "cerebral infarct") or tetraplegi* or ((thyroid adj (disease* or disorder* or dysfunction*)) or hyperthyroidism or hypothyroidism) or tuberculosis or (systemic adj (disorder* or disease*)) or ulcer* or (urogenital adj (disease* or disorder*)) or vasculopath* or (vascular adj (disease* or disorder*)) or vestibular or ((virus or viral) adj disease)).ti. |
| 46.                                                                                                                            | (child* or boy* or girl* or infant* or juvenil* or minors or paediatric* or pediatric* or school* or preschool* or pre-school* or kindergarten or nursery or preadolesc* or pre-adolesc* or pubert* or pubescen* or prepube* or pre-pube* or high-school or teen*).ti.                                                                                                                                                                                                                                                                                                                                                                                                                                                                                    |
| 47.                                                                                                                            | 40 or 42 or 43 or 44 or 45 or 46 or 46                                                                                                                                                                                                                                                                                                                                                                                                                                                                                                                                                                                                                                                                                                                    |
| <b>[Study design]</b>                                                                                                          |                                                                                                                                                                                                                                                                                                                                                                                                                                                                                                                                                                                                                                                                                                                                                           |
| 48.                                                                                                                            | (randomi?ed or randomi?ation or randomi?ing).af.                                                                                                                                                                                                                                                                                                                                                                                                                                                                                                                                                                                                                                                                                                          |
| 49.                                                                                                                            | (RCT or "at random" or (random* adj3 (assign* or allocat* or control* or crossover or cross-over or design* or divide* or division or number))).af.                                                                                                                                                                                                                                                                                                                                                                                                                                                                                                                                                                                                       |
| 50.                                                                                                                            | ((control* adj2 (trial or study or group)) and (placebo or waitlist* or wait* list* or ((treatment or care) adj2 usual) or (no intervention* or non intervention* or non-intervention* or without any intervention*))).af.                                                                                                                                                                                                                                                                                                                                                                                                                                                                                                                                |
| 51.                                                                                                                            | ((single or double or triple or treble) adj2 (blind* or mask* or dummy)).af.                                                                                                                                                                                                                                                                                                                                                                                                                                                                                                                                                                                                                                                                              |
| 52.                                                                                                                            | 48 or 49 or 50 or 51                                                                                                                                                                                                                                                                                                                                                                                                                                                                                                                                                                                                                                                                                                                                      |
| 53.                                                                                                                            | 35 and 39 and 52                                                                                                                                                                                                                                                                                                                                                                                                                                                                                                                                                                                                                                                                                                                                          |
| 54.                                                                                                                            | 53 not 47                                                                                                                                                                                                                                                                                                                                                                                                                                                                                                                                                                                                                                                                                                                                                 |
| ti: title; ab: abstract; kp: key phrase; fw: free descriptors word, contains additional controlled vocabulary; af: all fields. |                                                                                                                                                                                                                                                                                                                                                                                                                                                                                                                                                                                                                                                                                                                                                           |

### CINHAL (Complete) via EBSCOHOST will be searched using the following terms:

|                       |                                                                                                                                                                                                                                                                                                                                                                                                                                                                                                                                                                                                                                                                                                                                                                                                                                                                            |
|-----------------------|----------------------------------------------------------------------------------------------------------------------------------------------------------------------------------------------------------------------------------------------------------------------------------------------------------------------------------------------------------------------------------------------------------------------------------------------------------------------------------------------------------------------------------------------------------------------------------------------------------------------------------------------------------------------------------------------------------------------------------------------------------------------------------------------------------------------------------------------------------------------------|
| <b>[Intervention]</b> |                                                                                                                                                                                                                                                                                                                                                                                                                                                                                                                                                                                                                                                                                                                                                                                                                                                                            |
| 1.                    | (MH "Internet+")                                                                                                                                                                                                                                                                                                                                                                                                                                                                                                                                                                                                                                                                                                                                                                                                                                                           |
| 2.                    | (MH "Telecommunications+")                                                                                                                                                                                                                                                                                                                                                                                                                                                                                                                                                                                                                                                                                                                                                                                                                                                 |
| 3.                    | (MH "Computer Assisted Instruction")                                                                                                                                                                                                                                                                                                                                                                                                                                                                                                                                                                                                                                                                                                                                                                                                                                       |
| 4.                    | (MH "Therapy, Computer Assisted+")                                                                                                                                                                                                                                                                                                                                                                                                                                                                                                                                                                                                                                                                                                                                                                                                                                         |
| 5.                    | (MH "Remote Consultation")                                                                                                                                                                                                                                                                                                                                                                                                                                                                                                                                                                                                                                                                                                                                                                                                                                                 |
| 6.                    | AB ((telephon*) or (teleconferencing) or (teleconference*) or (teleconsult*) or (telehealth) or (tele-health) or (teletherap*) or (telecomm*) or (telemed*) or (telemonitor*) or (telephone) or (telepsych*) or (telephone-administered) or ("cell phone") or (cellphone) or (phone*)) OR TI ((telephon*) or (teleconferencing) or (teleconference*) or (teleconsult*) or (telehealth) or (tele-health) or (teletherap*) or (telecomm*) or (telemed*) or (telemonitor*) or (telephone) or (telepsych*) or (telephone-administered) or ("cell phone") or (cellphone) or (phone*)) OR SU ((telephon*) or (teleconferencing) or (teleconference*) or (teleconsult*) or (telehealth) or (tele-health) or (teletherap*) or (telecomm*) or (telemed*) or (telemonitor*) or (telephone) or (telepsych*) or (telephone-administered) or ("cell phone") or (cellphone) or (phone*)) |
| 7.                    | AB ((app) or (application)) OR TI ((app) or (application)) OR SU ((app) or (application))                                                                                                                                                                                                                                                                                                                                                                                                                                                                                                                                                                                                                                                                                                                                                                                  |
| 8.                    | AB ((internet) or (internet-delivered) or (internet-based) or ("internet-based CBT") or ("internet-based cognitive behavio* therap*")) or (internet-guided) or (interapy)) OR TI ((internet) or (internet-delivered) or (internet-based) or ("internet-based CBT") or ("internet-based cognitive behavio* therap*")) or (internet-guided) or (interapy)) OR SU ((internet) or (internet-delivered) or (internet-based) or ("internet-based CBT") or ("internet-based cognitive behavio* therap*")) or (internet-guided) or (interapy))                                                                                                                                                                                                                                                                                                                                     |
| 9.                    | AB ((online*) or (on-line) or (cyber*)) OR TI ((online*) or (on-line) or (cyber*)) OR SU ((online*) or (on-line) or (cyber*))                                                                                                                                                                                                                                                                                                                                                                                                                                                                                                                                                                                                                                                                                                                                              |
| 10.                   | AB (("Therapy, Computer-Assisted") or (computer-based) or (computer*) or (computer-administered) or (computer-assisted) or (computer-aided) or (computer-delivered)) OR TI (("Therapy, Computer-Assisted") or (computer-based) or (computer*) or (computer-administered) or (computer-assisted) or (computer-aided) or (computer-delivered)) OR SU (("Therapy, Computer-Assisted") or (computer-based) or (computer*) or (computer-administered) or (computer-assisted) or (computer-aided) or (computer-delivered))                                                                                                                                                                                                                                                                                                                                                       |
| 11.                   | AB ((website) or (web) or (web-based) or (www)) OR TI ((website) or (web) or (web-based) or (www)) OR SU ((website) or (web) or (web-based) or (www))                                                                                                                                                                                                                                                                                                                                                                                                                                                                                                                                                                                                                                                                                                                      |
| 12.                   | AB ((videoconferencing) or (videophone*) or (videoconference*) or (skype)) OR TI ((videoconferencing) or (videophone*) or (videoconference*) or (skype)) OR SU ((videoconferencing) or (videophone*) or (videoconference*) or (skype))                                                                                                                                                                                                                                                                                                                                                                                                                                                                                                                                                                                                                                     |



## Additional file 1 – search strategies of electronic databases

|     |                                                                                                                                                                                                                                                                                                                                                                                                                                                                                                                                                                                                                                                                                                                                                                                                                                                                                                                                                                                                                                                                                                                                                                                                                                                                                                                                                                                                                                                                                                                                                                                                                                                                                                                                                                                                                                                             |
|-----|-------------------------------------------------------------------------------------------------------------------------------------------------------------------------------------------------------------------------------------------------------------------------------------------------------------------------------------------------------------------------------------------------------------------------------------------------------------------------------------------------------------------------------------------------------------------------------------------------------------------------------------------------------------------------------------------------------------------------------------------------------------------------------------------------------------------------------------------------------------------------------------------------------------------------------------------------------------------------------------------------------------------------------------------------------------------------------------------------------------------------------------------------------------------------------------------------------------------------------------------------------------------------------------------------------------------------------------------------------------------------------------------------------------------------------------------------------------------------------------------------------------------------------------------------------------------------------------------------------------------------------------------------------------------------------------------------------------------------------------------------------------------------------------------------------------------------------------------------------------|
| 13. | AB (("electronic mail") or ("electronic and mail") or ("electronic and communication") or ("electronic health*") or (e-mail*) or (email*)) OR TI (("electronic mail") or ("electronic and mail") or ("electronic and communication") or ("electronic health*") or (e-mail*) or (email*)) OR SU (("electronic mail") or ("electronic and mail") or ("electronic and communication") or ("electronic health*") or (e-mail*) or (email*))                                                                                                                                                                                                                                                                                                                                                                                                                                                                                                                                                                                                                                                                                                                                                                                                                                                                                                                                                                                                                                                                                                                                                                                                                                                                                                                                                                                                                      |
| 14. | AB ((virtual*) or (vr)) OR TI ((virtual*) or (vr)) OR SU ((virtual*) or (vr))                                                                                                                                                                                                                                                                                                                                                                                                                                                                                                                                                                                                                                                                                                                                                                                                                                                                                                                                                                                                                                                                                                                                                                                                                                                                                                                                                                                                                                                                                                                                                                                                                                                                                                                                                                               |
| 15. | AB (("augmented reality") or (ar)) OR TI (("augmented reality") or (ar)) OR SU (("augmented reality") or (ar))                                                                                                                                                                                                                                                                                                                                                                                                                                                                                                                                                                                                                                                                                                                                                                                                                                                                                                                                                                                                                                                                                                                                                                                                                                                                                                                                                                                                                                                                                                                                                                                                                                                                                                                                              |
| 16. | AB (("text and messag*") or (SMS) or ("short and messag*") or ("text messag*") or (texting)) OR TI (("text and messag*") or (SMS) or ("short and messag*") or ("text messag*") or (texting)) OR SU (("text and messag*") or (SMS) or ("short and messag*") or ("text messag*") or (texting))                                                                                                                                                                                                                                                                                                                                                                                                                                                                                                                                                                                                                                                                                                                                                                                                                                                                                                                                                                                                                                                                                                                                                                                                                                                                                                                                                                                                                                                                                                                                                                |
| 17. | AB ((emedicine) or (ehealth) or (e-medicine) or (e-health) or (mhealth) or (m-health) or (e-portal) or (eportal) or (etherap*) or (e-therap*)) OR TI ((emedicine) or (ehealth) or (e-medicine) or (e-health) or (mhealth) or (m-health) or (e-portal) or (eportal) or (etherap*) or (e-therap*)) OR SU ((emedicine) or (ehealth) or (e-medicine) or (e-health) or (mhealth) or (m-health) or (e-portal) or (eportal) or (etherap*) or (e-therap*))                                                                                                                                                                                                                                                                                                                                                                                                                                                                                                                                                                                                                                                                                                                                                                                                                                                                                                                                                                                                                                                                                                                                                                                                                                                                                                                                                                                                          |
| 18. | AB (("technolog*-assisted") or ("technolog*-based") or (technolog*) or ("technology-based intervention")) OR TI (("technolog*-assisted") or ("technolog*-based") or (technolog*) or ("technology-based intervention")) OR SU (("technolog*-assisted") or ("technolog*-based") or (technolog*) or ("technology-based intervention"))                                                                                                                                                                                                                                                                                                                                                                                                                                                                                                                                                                                                                                                                                                                                                                                                                                                                                                                                                                                                                                                                                                                                                                                                                                                                                                                                                                                                                                                                                                                         |
| 19. | AB ((interactive) or (multi-media) or (multimedia)) OR TI ((interactive) or (multi-media) or (multimedia)) OR SU ((interactive) or (multi-media) or (multimedia))                                                                                                                                                                                                                                                                                                                                                                                                                                                                                                                                                                                                                                                                                                                                                                                                                                                                                                                                                                                                                                                                                                                                                                                                                                                                                                                                                                                                                                                                                                                                                                                                                                                                                           |
| 20. | AB ((android) or (ios) or (windows) or (software)) OR TI ((android) or (ios) or (windows) or (software)) OR SU ((android) or (ios) or (windows) or (software))                                                                                                                                                                                                                                                                                                                                                                                                                                                                                                                                                                                                                                                                                                                                                                                                                                                                                                                                                                                                                                                                                                                                                                                                                                                                                                                                                                                                                                                                                                                                                                                                                                                                                              |
| 21. | AB (ict) OR TI (ict) OR SU (ict)                                                                                                                                                                                                                                                                                                                                                                                                                                                                                                                                                                                                                                                                                                                                                                                                                                                                                                                                                                                                                                                                                                                                                                                                                                                                                                                                                                                                                                                                                                                                                                                                                                                                                                                                                                                                                            |
| 22. | AB ((ipad) or (i-pad) or (iphone) or (i-phone) or (ipod) or (i-pod)) OR TI ((ipad) or (i-pad) or (iphone) or (i-phone) or (ipod) or (i-pod)) OR SU ((ipad) or (i-pad) or (iphone) or (i-phone) or (ipod) or (i-pod))                                                                                                                                                                                                                                                                                                                                                                                                                                                                                                                                                                                                                                                                                                                                                                                                                                                                                                                                                                                                                                                                                                                                                                                                                                                                                                                                                                                                                                                                                                                                                                                                                                        |
| 23. | AB (("social medi*") or ("social network* site*") or (facebook) or (blog) or (chat) or (forum*) or ("chat group")) OR TI (("social medi*") or ("social network* site*") or (facebook) or (blog) or (chat) or (forum*) or ("chat group")) OR SU (("social medi*") or ("social network* site*") or (facebook) or (blog) or (chat) or (forum*) or ("chat group"))                                                                                                                                                                                                                                                                                                                                                                                                                                                                                                                                                                                                                                                                                                                                                                                                                                                                                                                                                                                                                                                                                                                                                                                                                                                                                                                                                                                                                                                                                              |
| 24. | AB ((cCBT) or (iCBT) or (iact) or (bcbt)) OR TI ((cCBT) or (iCBT) or (iact) or (bcbt)) OR SU ((cCBT) or (iCBT) or (iact) or (bcbt))                                                                                                                                                                                                                                                                                                                                                                                                                                                                                                                                                                                                                                                                                                                                                                                                                                                                                                                                                                                                                                                                                                                                                                                                                                                                                                                                                                                                                                                                                                                                                                                                                                                                                                                         |
| 25. | AB ((gaming) or ("instant messag*") or ("smart phone") or (smartphone) or (mobile) or (smartphone-supported) or ("with remind*")) OR TI ((gaming) or ("instant messag*") or ("smart phone") or (smartphone) or (mobile) or (smartphone-supported) or ("with remind*")) OR SU ((gaming) or ("instant messag*") or ("smart phone") or (smartphone) or (mobile) or (smartphone-supported) or ("with remind*"))                                                                                                                                                                                                                                                                                                                                                                                                                                                                                                                                                                                                                                                                                                                                                                                                                                                                                                                                                                                                                                                                                                                                                                                                                                                                                                                                                                                                                                                 |
| 26. | AB ((podcast) or (audio*)) OR TI ((podcast) or (audio*)) OR SU ((podcast) or (audio*))                                                                                                                                                                                                                                                                                                                                                                                                                                                                                                                                                                                                                                                                                                                                                                                                                                                                                                                                                                                                                                                                                                                                                                                                                                                                                                                                                                                                                                                                                                                                                                                                                                                                                                                                                                      |
| 27. | AB ((personal digital assistant) or (PDA) or (palmtop)) OR TI ((personal digital assistant) or (PDA) or (palmtop)) OR SU ((personal digital assistant) or (PDA) or (palmtop))                                                                                                                                                                                                                                                                                                                                                                                                                                                                                                                                                                                                                                                                                                                                                                                                                                                                                                                                                                                                                                                                                                                                                                                                                                                                                                                                                                                                                                                                                                                                                                                                                                                                               |
| 28. | AB ((CD-ROM) or (DVD)) OR TI ((CD-ROM) or (DVD)) OR SU ((CD-ROM) or (DVD))                                                                                                                                                                                                                                                                                                                                                                                                                                                                                                                                                                                                                                                                                                                                                                                                                                                                                                                                                                                                                                                                                                                                                                                                                                                                                                                                                                                                                                                                                                                                                                                                                                                                                                                                                                                  |
| 29. | AB (digital) OR TI (digital) OR SU (digital)                                                                                                                                                                                                                                                                                                                                                                                                                                                                                                                                                                                                                                                                                                                                                                                                                                                                                                                                                                                                                                                                                                                                                                                                                                                                                                                                                                                                                                                                                                                                                                                                                                                                                                                                                                                                                |
| 30. | AB (("face to face versus") or ("blended therap*" or "blended-therap*" or blended N5 therap*)) OR TI (("face to face versus") or ("blended therap*" or "blended-therap*" or blended N5 therap*)) OR SU (("face to face versus") or ("blended therap*" or "blended-therap*" or blended N5 therap*))                                                                                                                                                                                                                                                                                                                                                                                                                                                                                                                                                                                                                                                                                                                                                                                                                                                                                                                                                                                                                                                                                                                                                                                                                                                                                                                                                                                                                                                                                                                                                          |
| 31. | AB ((distance) or (remote*)) OR TI ((distance) or (remote*)) OR SU ((distance) or (remote*))                                                                                                                                                                                                                                                                                                                                                                                                                                                                                                                                                                                                                                                                                                                                                                                                                                                                                                                                                                                                                                                                                                                                                                                                                                                                                                                                                                                                                                                                                                                                                                                                                                                                                                                                                                |
| 32. | AB (("Keeping the blues away") or (deprexis) or ("beating the blues") or ("overcoming depression") or (odin) or ("restoring the balance") or (MoodGym) or ("Mood Gym") or (Moodhelper) or ("mood helper") or (Sparx) or ("mood enhancer") or (moodenhancer) or ("get.on mood enhancer") or (sadnessprogram) or (subgap) or ("master your mood") or (mym) or (e-coach) or ("colour your life") or (cyl) or ("kleur je leven") or (psyfit) or ("getting started") or ("mood manager") or (moodmanager) or (pst) or ("livinglifetothe full") or (llttf) or ("project uplift") or ("the brighten your mood program")) OR TI (("Keeping the blues away") or (deprexis) or ("beating the blues") or ("overcoming depression") or (odin) or ("restoring the balance") or (MoodGym) or ("Mood Gym") or (Moodhelper) or ("mood helper") or (Sparx) or ("mood enhancer") or (moodenhancer) or ("get.on mood enhancer") or (sadnessprogram) or (subgap) or ("master your mood") or (mym) or (e-coach) or ("colour your life") or (cyl) or ("kleur je leven") or (psyfit) or ("getting started") or ("mood manager") or (moodmanager) or (pst) or ("livinglifetothe full") or (llttf) or ("project uplift") or ("the brighten your mood program")) OR SU (("Keeping the blues away") or (deprexis) or ("beating the blues") or ("overcoming depression") or (odin) or ("restoring the balance") or (MoodGym) or ("Mood Gym") or (Moodhelper) or ("mood helper") or (Sparx) or ("mood enhancer") or (moodenhancer) or ("get.on mood enhancer") or (sadnessprogram) or (subgap) or ("master your mood") or (mym) or (e-coach) or ("colour your life") or (cyl) or ("kleur je leven") or (psyfit) or ("getting started") or ("mood manager") or (moodmanager) or (pst) or ("livinglifetothe full") or (llttf) or ("project uplift") or ("the brighten your mood program")) |
| 33. | TX depression*                                                                                                                                                                                                                                                                                                                                                                                                                                                                                                                                                                                                                                                                                                                                                                                                                                                                                                                                                                                                                                                                                                                                                                                                                                                                                                                                                                                                                                                                                                                                                                                                                                                                                                                                                                                                                                              |
| 34. | LA swedish                                                                                                                                                                                                                                                                                                                                                                                                                                                                                                                                                                                                                                                                                                                                                                                                                                                                                                                                                                                                                                                                                                                                                                                                                                                                                                                                                                                                                                                                                                                                                                                                                                                                                                                                                                                                                                                  |
| 35. | 33 AND 34                                                                                                                                                                                                                                                                                                                                                                                                                                                                                                                                                                                                                                                                                                                                                                                                                                                                                                                                                                                                                                                                                                                                                                                                                                                                                                                                                                                                                                                                                                                                                                                                                                                                                                                                                                                                                                                   |
| 36. | 1 OR 2 OR 3 OR 4 OR 5 OR 6 OR 7 OR 8 OR 9 OR 10 OR 11 OR 12 OR 13 OR 14 OR 15 OR 16 OR 17 OR 18 OR 19 OR 20 OR 21 OR 22 OR 23 OR 24 OR 25 OR 26 OR 27 OR 28 OR 29 OR 30 OR 31 OR 32 OR 35                                                                                                                                                                                                                                                                                                                                                                                                                                                                                                                                                                                                                                                                                                                                                                                                                                                                                                                                                                                                                                                                                                                                                                                                                                                                                                                                                                                                                                                                                                                                                                                                                                                                   |

Additional file 1 – search strategies of electronic databases

| <b>[Population/Condition]</b>                                                                                                                                      |                                                                                                                                                                                                                                                                                                                                                                                                                                                                                                                                                                                                                                                                                                                                                                                                                                                                                                                                                       |
|--------------------------------------------------------------------------------------------------------------------------------------------------------------------|-------------------------------------------------------------------------------------------------------------------------------------------------------------------------------------------------------------------------------------------------------------------------------------------------------------------------------------------------------------------------------------------------------------------------------------------------------------------------------------------------------------------------------------------------------------------------------------------------------------------------------------------------------------------------------------------------------------------------------------------------------------------------------------------------------------------------------------------------------------------------------------------------------------------------------------------------------|
| 37.                                                                                                                                                                | (MH "Depression+")                                                                                                                                                                                                                                                                                                                                                                                                                                                                                                                                                                                                                                                                                                                                                                                                                                                                                                                                    |
| 38.                                                                                                                                                                | AB ((dysthymi*) or (depression) or (depressed) or (depressive) or ("mood disorder") or ("affective disorder")) OR TI ((dysthymi*) or (depression) or (depressed) or (depressive) or ("mood disorder") or ("affective disorder")) OR SU ((dysthymi*) or (depression) or (depressed) or (depressive) or ("mood disorder") or ("affective disorder"))                                                                                                                                                                                                                                                                                                                                                                                                                                                                                                                                                                                                    |
| 39.                                                                                                                                                                | 37 OR 38                                                                                                                                                                                                                                                                                                                                                                                                                                                                                                                                                                                                                                                                                                                                                                                                                                                                                                                                              |
| <b>[Physical conditions (38-43) and age group (44) served as exclusion criteria]</b>                                                                               |                                                                                                                                                                                                                                                                                                                                                                                                                                                                                                                                                                                                                                                                                                                                                                                                                                                                                                                                                       |
| 40.                                                                                                                                                                | TI ("physical* ill*" or "medical* ill*" or "chronic disease" or (chronic* next (ill* or condition*1 or disease* or disorder* or health)) or (long term next (condition*1 or sick*)) or "medical* morbid*" or (medical* next (comorbid* or co morbid*)) or multimorbid* or (multi* next (morbid* or "co morbid*" or comorbid* or physical)))                                                                                                                                                                                                                                                                                                                                                                                                                                                                                                                                                                                                           |
| 41.                                                                                                                                                                | TI (AIDS or allerg* or angina or aneurysm or "ankylosing spondylitis" or arthropath* or arthriti* or arthrosis or arthroses or asthma* or "atrial fibrillation" or "autoimmune disease*" or "back pain" or blindness or "brain atroph*" or (bone next (disease* or disorder*)) or ((bronchi* or bowel) next (disease* or disorder*)) or bypass or (cancer or neoplasm* or neoplastic or malignan*) or (cardiac next (arrest or arrhythmia* or surg*)) or cardiomyopath* or ((cardiovascular or coronary) N2 (disease* or disorder* or event*)) or "cerebral palsy" or (cerebrovascular N2 (disease* or disorder* or event*)) or "chronic obstructive" or COPD or pain or cirrhosis or colitis or "congenital abnormalit*" or (congenital N2 (disease or disorder*)) or coxarthrosis or Crohn* or Cushing* or "cystic fibrosis" or cystitis)                                                                                                           |
| 42.                                                                                                                                                                | TI (deaf* or deformit* or disabled or (physical next (deform* or disab* or impair*)) or dermatitis or dermato* or dorsopath* or diabet* or "digestive system*" or duoden* or dystonia or eczema or (endocrine next (disease* or disorder*)) or enuresis or epilep* or "eye disease*" or ("fatigue syndrome" or "chronic fatigue") or fibromyalgia or fibrosis or "food hypersensitivity" or (gastr* next (disease* or disorder*)) or gastritis or "genetic disorder*" or gout or (glomerul* next (disease* or disorder*)) or headache* or ((h?emic or lymph*) next (disease* or disorder*)) or h?ematuria or h?emophili* or h?emorrhag* or ((hearing or visual or vision) N2 (aid* or impair* or loss)) or hemiplegi* or hepatitis or h?emodialysis or ((renal or kidney) next (disease* or disorder* or failure)) or (heart next (disease* or disorder* or failure or surg*)) or HIV or "human immunodeficiency virus" or hypertensi* or hypotensi*) |
| 43.                                                                                                                                                                | TI ("inflammatory disease*" or incontinen* or "irritable bowel" or isch?emi* or (joint next (disease* or disorder*)) or kyphosis or leuk? emia or ((liver or hepatic) next (disease* or disorder* or failure)) or lordosis or "lung disease*" or "lupus erythemat*" or lymphoma or "macular degeneration" or migraine* or "movement disorder*" or musculoskeletal or necrotizing or nephrotic* or neuromuscular or "multiple sclerosis" or myeloma)                                                                                                                                                                                                                                                                                                                                                                                                                                                                                                   |
| 44.                                                                                                                                                                | TI ("nephrotic syndrome" or ((nutritional or metabolic) next (disease* or disorder or syndrome*)) or (organ* N2 (transplant* or recipient*)) or (neurological next (disease* or disorder*)) or occlusion* or obesity or obese or orthop?edic* or osteo* or "otitis media" or otorhinolaryngology* or otosclerosis or pancrea* or papulosquamous or paraplegi* or parkinson* or "peripheral vascular" or "pick disease*" or pneumoconiosis or polio* or polyarthropath* or polyarthritis or polyarthrosis or polyneuropath* or psoriasis or parapsoriasis or (pulmonary N2 (disease* or disorder*))                                                                                                                                                                                                                                                                                                                                                    |
| 45.                                                                                                                                                                | TI ((respiratory next (disease* or disorder*)) or retinopathy or rheumat* or sclerosis or scoliosis or "sickle cell an?emia" or ((skin or "connective tissue") next (disease* or disorder*)) or ("sleep disorder*" or "sleep apn?ea" or insomnia* or dyssomnia* or hypersomnia*) or "spina bifida" or "spinal muscular atropy" or spondylo* or stenosis* or stoma* or (stroke or strokes or "cerebral infarct*") or tetraplegi* or ((thyroid next (disease* or disorder* or dysfunction*)) or hyperthyroidism or hypothyroidism) or tuberculosis or (systemic next (disorder* or disease*)) or ulcer* or (urogenital next (disease* or disorder*)) or vasculopath* or (vascular next (disease* or disorder*)) or vestibular or ((virus or viral) next disease))                                                                                                                                                                                       |
| 46.                                                                                                                                                                | TI (child* or boy* or girl* or infant* or juvenil* or minors or paediatric* or pediatric* or school* or preschool* or pre-school* or kindergarten or nursery or preadolesc* or pre-adolesc* or pubert* or pubescen* or prepube* or pre-pube* or high-school or teen*)                                                                                                                                                                                                                                                                                                                                                                                                                                                                                                                                                                                                                                                                                 |
| 47.                                                                                                                                                                | 40 OR 41 OR 42 OR 43 OR 44 OR 45 OR 46                                                                                                                                                                                                                                                                                                                                                                                                                                                                                                                                                                                                                                                                                                                                                                                                                                                                                                                |
| <b>[Study design]</b>                                                                                                                                              |                                                                                                                                                                                                                                                                                                                                                                                                                                                                                                                                                                                                                                                                                                                                                                                                                                                                                                                                                       |
| 48.                                                                                                                                                                | TX (randomi?ed or randomi?ation or randomi?ing)                                                                                                                                                                                                                                                                                                                                                                                                                                                                                                                                                                                                                                                                                                                                                                                                                                                                                                       |
| 49.                                                                                                                                                                | TX ((control* N2 (trial or study or group)) and (placebo or waitlist* or wait* list* or ((treatment or care) N2 usual) or (no intervention* or non intervention* or non-intervention* or without any intervention*)))                                                                                                                                                                                                                                                                                                                                                                                                                                                                                                                                                                                                                                                                                                                                 |
| 50.                                                                                                                                                                | TX (RCT or "at random" or (random* N3 (assign* or allocat* or control* or crossover or cross-over or design* or divide* or division or number)))                                                                                                                                                                                                                                                                                                                                                                                                                                                                                                                                                                                                                                                                                                                                                                                                      |
| 51.                                                                                                                                                                | TX ((single or double or triple or treble) N2 (blind* or mask* or dummy))                                                                                                                                                                                                                                                                                                                                                                                                                                                                                                                                                                                                                                                                                                                                                                                                                                                                             |
| 52.                                                                                                                                                                | 48 OR 49 OR 50 OR 51                                                                                                                                                                                                                                                                                                                                                                                                                                                                                                                                                                                                                                                                                                                                                                                                                                                                                                                                  |
| 53.                                                                                                                                                                | 36 AND 39 AND 52                                                                                                                                                                                                                                                                                                                                                                                                                                                                                                                                                                                                                                                                                                                                                                                                                                                                                                                                      |
| 54.                                                                                                                                                                | 52 NOT 47                                                                                                                                                                                                                                                                                                                                                                                                                                                                                                                                                                                                                                                                                                                                                                                                                                                                                                                                             |
| 55.                                                                                                                                                                | 50 NOT 47 (limiters – exclude medline records)                                                                                                                                                                                                                                                                                                                                                                                                                                                                                                                                                                                                                                                                                                                                                                                                                                                                                                        |
| MH: CINAHL Exact Subject Heading (standardized vocabulary); TI: title; AB: abstract; SU: subject heading, searches all subject fields in the record; TX: all text. |                                                                                                                                                                                                                                                                                                                                                                                                                                                                                                                                                                                                                                                                                                                                                                                                                                                                                                                                                       |
